# Supplementary material for: Effect of the boron element in a Li–P–S system
Source: Royal Society of Chemistry journal article supplement (doi:10.1039/d3dt02883f), 2023-01-01
Supplement: d3dt02883f1.pdf [file d3dt02883f1.pdf]

## Supporting information for

### Effect of Boron Element in Li-P-S system

Audric Neveu<sup>1,2</sup>, Hari Raj<sup>1,2</sup>, Vincent Pelé<sup>3</sup>, Christian Jordy<sup>3</sup> and Valerie Pralong<sup>1,2\*</sup>

<sup>1</sup>Normandie Univ, Ensicaen, Unicaen, CNRS, Crismat, 14000 Caen, France

<sup>2</sup>Réseau sur le Stockage Electrochimique de l'Énergie (RS2E), 80000 Amiens, France

<sup>3</sup>SAFT, 111-113 Bd Alfred Daney 33074 Bordeaux, France

\* [valerie.pralong@cnrs.fr](mailto:valerie.pralong@cnrs.fr)

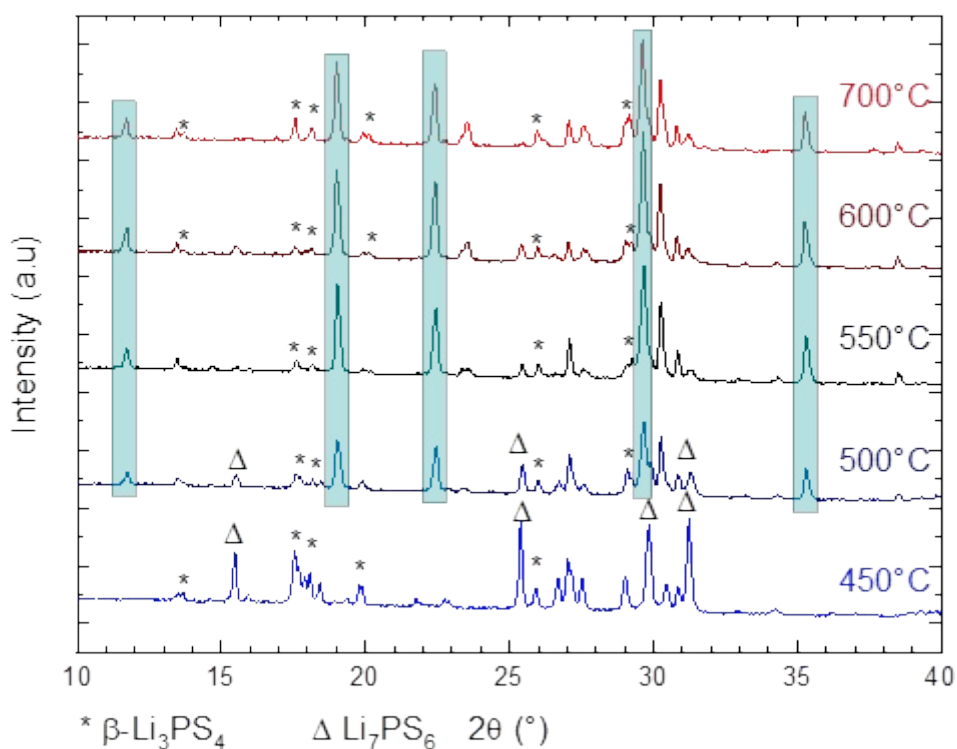

Figure S1. XRD patterns of the nominal chemical composition 0.6Li<sub>3</sub>PS<sub>4</sub>-0.4Li<sub>3</sub>BS<sub>3</sub> at different annealing temperature between 450°C and 700°C. New peaks corresponding to the LGPS type structure are identified starting at 500°C (highlighted in blue), Impurities have been identified as: β-Li<sub>3</sub>PS<sub>4</sub> (\*) and Li<sub>7</sub>PS<sub>6</sub> (Δ) phases.

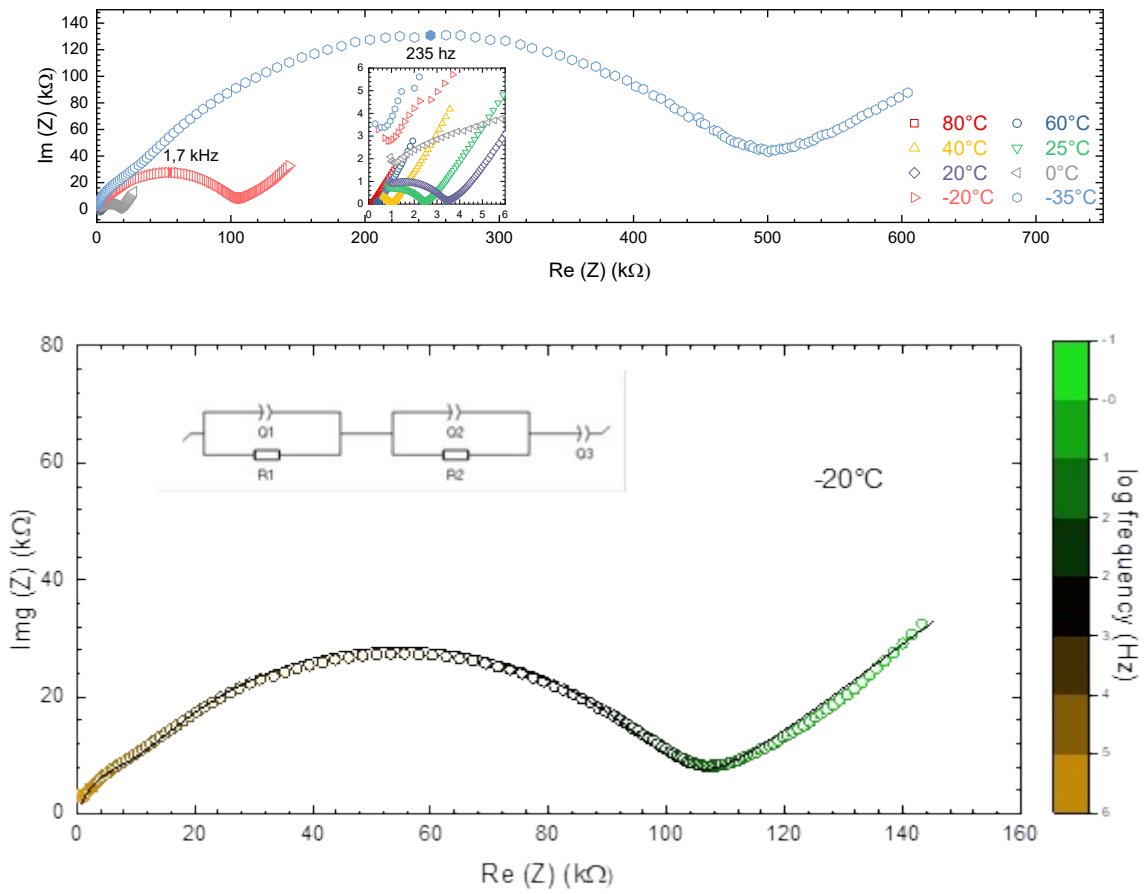

Figure S2. (a) Nyquist diagram of the sample  $\text{Li}_3\text{P}_{0.6}\text{B}_{0.4}\text{S}_{3.6}$  at different temperature and (b) Fitted curve with the associated equivalent circuit for the Nyquist diagram at  $-20^\circ\text{C}$ .

Table S1 Values from fitted diagram from sample  $Li_3P_{0.6}B_{0.4}S_{3.6}$  at each temperature

| Temperature | -35°C                                           | -20°C                                           | 0°C                                           | 20°C                                           |
|-------------|-------------------------------------------------|-------------------------------------------------|-----------------------------------------------|------------------------------------------------|
| R1          | 9 245 Ohm<br>(± 280)                            | 3 167 Ohm<br>(± 102)                            | N/A                                           | N/A                                            |
| Q1          | 0.534 9e-9 F.s <sup>(a-1)</sup><br>(± 6.2 e-11) | 0.545 2e-9 F.s <sup>(a-1)</sup><br>(± 2.5 e-11) | N/A                                           | N/A                                            |
| a1          | 1                                               | 1                                               | N/A                                           | N/A                                            |
| R2          | 459 394 Ohm<br>(± 316)                          | 100 862 Ohm<br>(± 121)                          | 16 643 Ohm<br>(± 32.2)                        | 3 607 Ohm<br>(± 6.3)                           |
| Q2          | 20.14e-9 F.s <sup>(a-1)</sup><br>(± 6.2 e-11)   | 32.06e-9 F.s <sup>(a-1)</sup><br>(± 1.3 e-10)   | 69.52e-9 F.s <sup>(a-1)</sup><br>(± 3.0 e-9)  | 75.7 e-9 F.s <sup>(a-1)</sup><br>(± 5.2 e-9)   |
| a2          | 0.639<br>(± 0.38 e-3)                           | 0.622<br>(± 0.45 e-3)                           | 0.574<br>(± 3.42 e-3)                         | 0.585<br>(± 6.17 e-3)                          |
| Q3          | 7.498e-6 F.s <sup>(a-1)</sup><br>(± 2.1 e-8)    | 23.47e-6 F.s <sup>(a-1)</sup><br>(± 6.5 e-8)    | 75.77e-6 F.s <sup>(a-1)</sup><br>(± 0.38 e-6) | 0.155 e-3 F.s <sup>(a-1)</sup><br>(± 0.42 e-6) |
| a3          | 0.361<br>(± 1.32 e-3)                           | 0.414<br>(± 1.43 e-3)                           | 0.5158<br>(± 1.11 e-3)                        | 0.585<br>(± 1.61 e-3)                          |

| Temperature | 25°C                                          | 40°C                                          | 60°C                                          | 80°C                                           |
|-------------|-----------------------------------------------|-----------------------------------------------|-----------------------------------------------|------------------------------------------------|
| R2          | 2 553 Ohm<br>(± 8.0)                          | 1 027 Ohm<br>(± 3.2)                          | 377 Ohm<br>(± 1.17)                           | 162 Ohm<br>(± 1.27)                            |
| Q2          | 27.44e-9 F.s <sup>(a-1)</sup><br>(± 4.6 e-9)  | 45.52e-9 F.s <sup>(a-1)</sup><br>(± 4.71 e-9) | 0.229e-6 F.s <sup>(a-1)</sup><br>(± 1.3 e-8)  | N/A                                            |
| a2          | 0.595<br>(± 4.8 e-3)                          | 0.623<br>(± 6.5 e-3)                          | 0.513<br>(± 0.18 e-3)                         | N/A                                            |
| Q3          | 0.180e-3 F.s <sup>(a-1)</sup><br>(± 0.57 e-6) | 0.277e-3 F.s <sup>(a-1)</sup><br>(± 0.59 e-6) | 0.433e-3 F.s <sup>(a-1)</sup><br>(± 0.77 e-6) | 0.607 e-3 F.s <sup>(a-1)</sup><br>(± 1.87 e-6) |
| a3          | 0.603<br>(± 2.2 e-3)                          | 0.623<br>(± 1.3 e-3)                          | 0.661<br>(± 0.97 e-3)                         | 0.651<br>(± 1.63 e-3)                          |

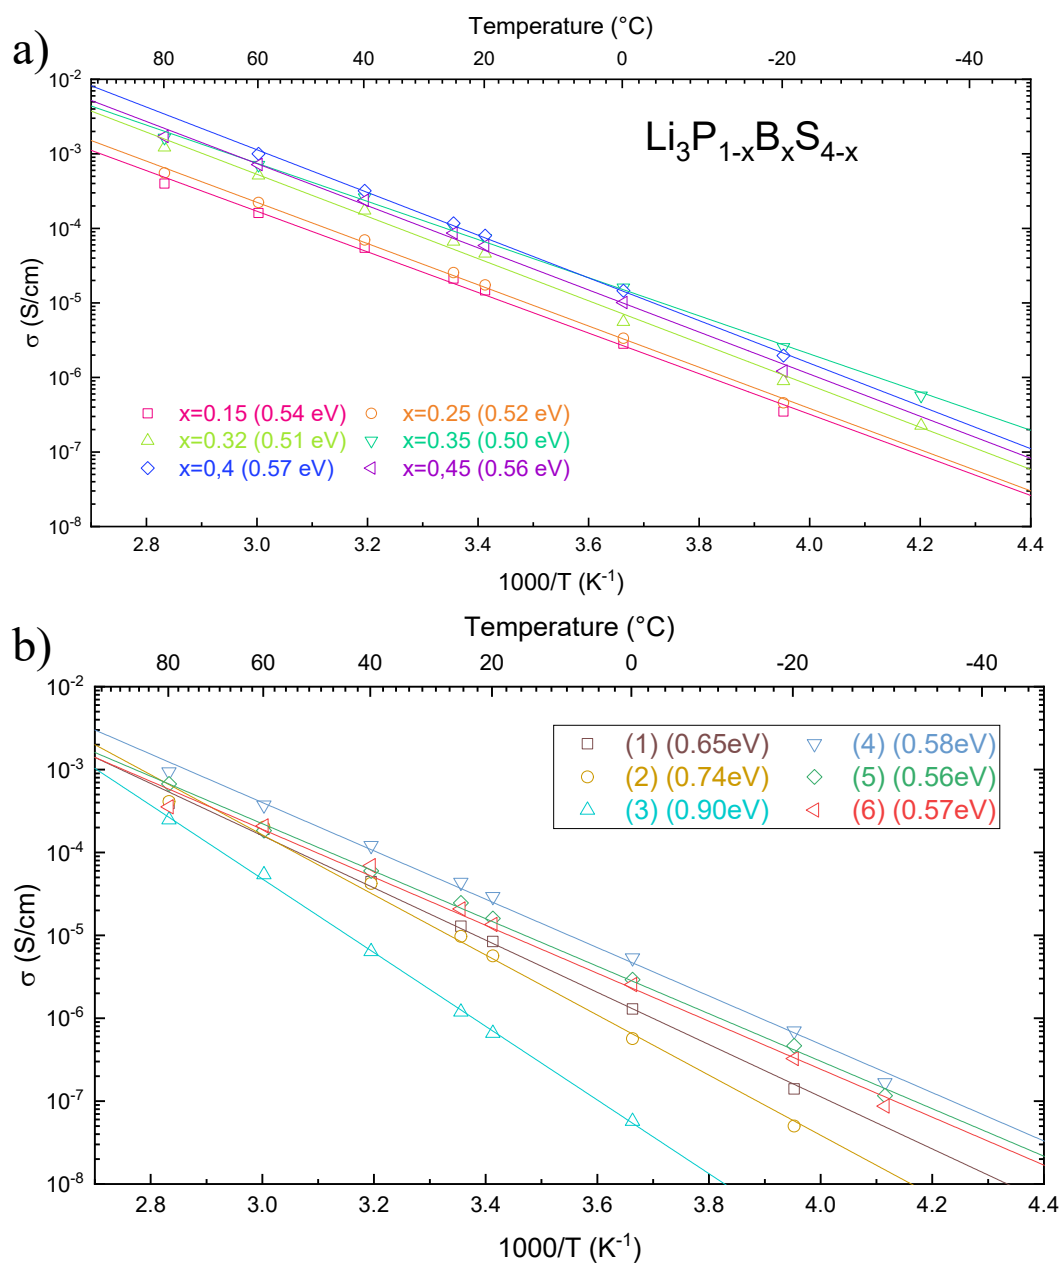

Figure S3. a) Arrhenius plot with associated activation energy of composition  $Li_3P_{1-x}B_xS_{4-x}$  ( $0.15 < x < 0.45$ ) in binary system, and b) Arrhenius plot with associated activation energy of compositions of the ternary  $Li_2S-P_2S_5-B_2S_3$  system as given in the table 1.

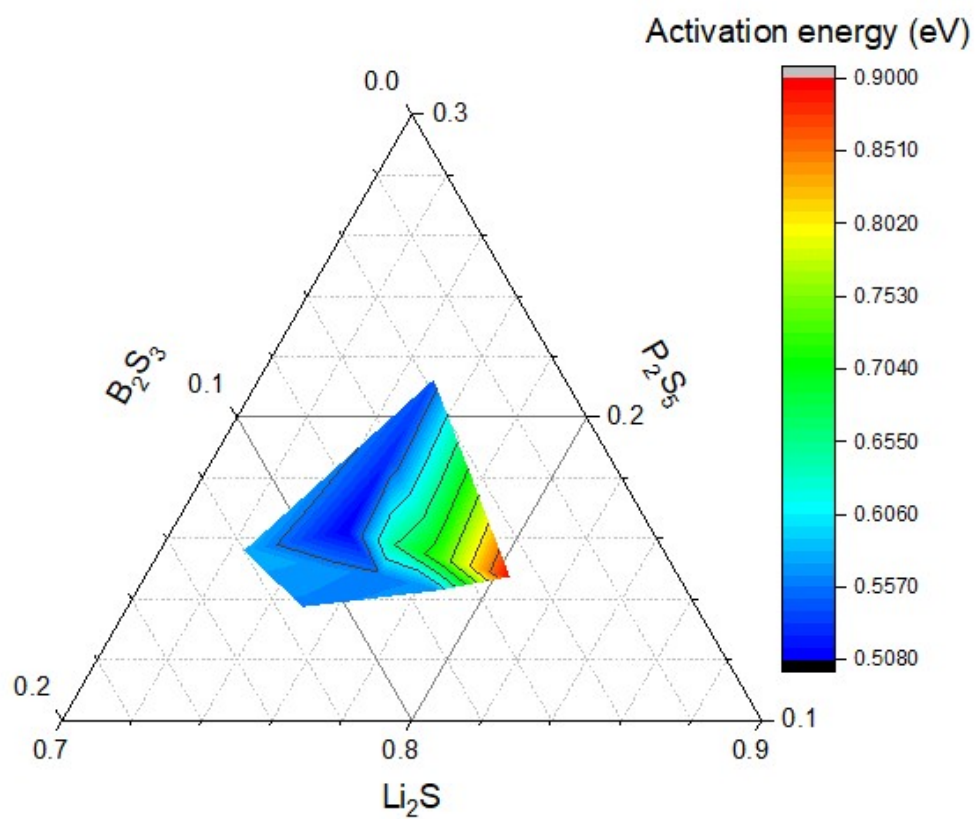

Figure S4. Contrast color of the activation energy in function of the composition inside the  $\text{Li}_2\text{S}$ - $\text{P}_2\text{S}_5$ - $\text{B}_2\text{S}_3$  ternary.

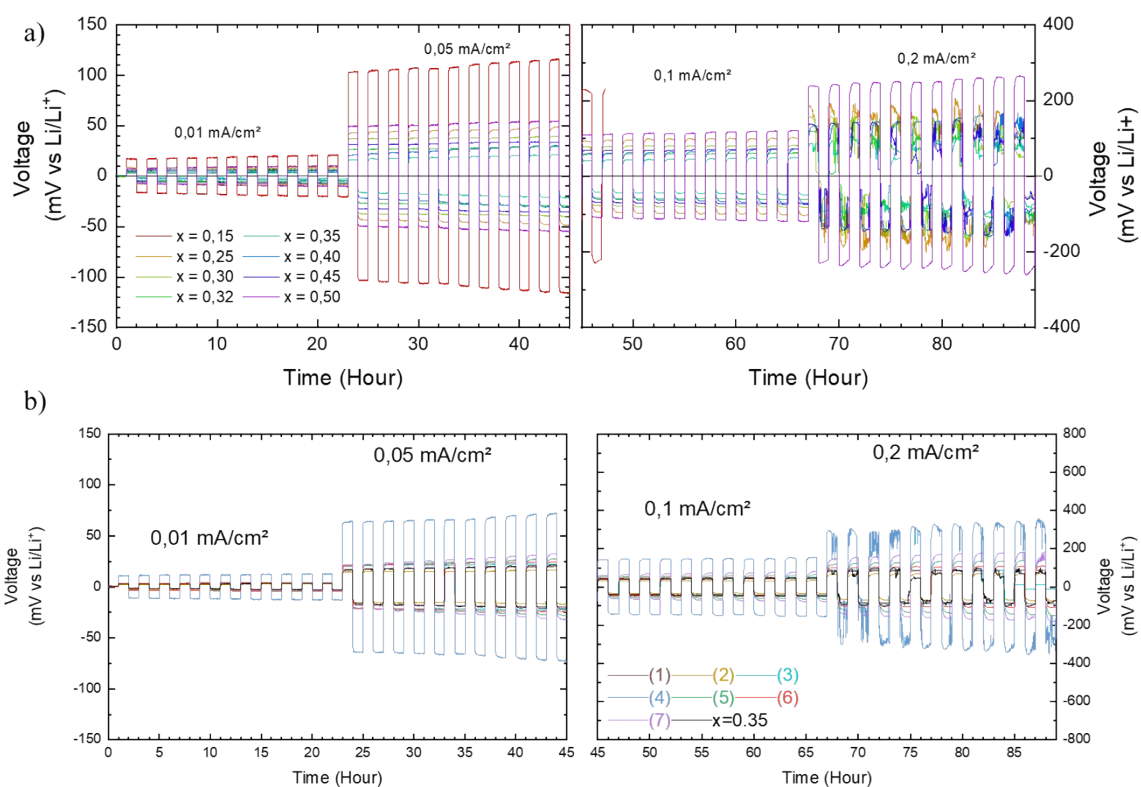

Figure S5. Polarization profile of symmetric cell made from compound a)  $\text{Li}_3\text{P}_{1-x}\text{B}_x\text{S}_{4-x}$  ( $0.15 < x < 0.5$ ) and b) other composition of the ternary  $\text{Li}_2\text{S}-\text{P}_2\text{S}_5-\text{B}_2\text{S}_3$  at different current density
